# Supplementary material
Source: MDPI journal article supplement (https://www.mdpi.com/2073-4395/9/12/853)
Supplement: s1 [file s1]

Table S1. Proportion of each nematode classification to the total free-living nematodes

Ushiku I

|                          | bacterivore  |          |           |          |             |                |         |         | fungivore & omnivore |               |        |        |           |             |             |
|--------------------------|--------------|----------|-----------|----------|-------------|----------------|---------|---------|----------------------|---------------|--------|--------|-----------|-------------|-------------|
|                          | Cephalobidae |          |           |          | Rhabditidae |                |         |         | other bacterivore    | Aphelenchidae |        |        | Filenchus | Ditylenchus | Dorylaimida |
|                          | Acroboloidea | others   | Rhabditis | others   | Aphelenchus | Aphelenchoides |         |         |                      |               |        |        |           |             |             |
| 2-week prior to planting |              |          |           |          |             |                |         |         |                      |               |        |        |           |             |             |
| control                  | 89 ± 2%      | 46 ± 5%  | 26 ± 9%   | 20 ± 5%  | 33 ± 5%     | 20 ± 10%       | 13 ± 7% | 10 ± 3% | 11 ± 2%              | 3 ± 2%        | 3 ± 2% | 0 ± 0% | 1 ± 1%    | 0 ± 0%      | 6 ± 1%      |
| fluensulfone             | 85 ± 4%      | 54 ± 7%  | 30 ± 13%  | 24 ± 9%  | 23 ± 3%     | 15 ± 1%        | 8 ± 3%  | 8 ± 5%  | 15 ± 4%              | 8 ± 2%        | 7 ± 1% | 0 ± 0% | 1 ± 1%    | 0 ± 0%      | 6 ± 4%      |
| fosthiazate              | 91 ± 4%      | 57 ± 7%  | 26 ± 10%  | 31 ± 17% | 26 ± 9%     | 18 ± 5%        | 8 ± 4%  | 8 ± 4%  | 9 ± 4%               | 4 ± 1%        | 4 ± 1% | 0 ± 0% | 1 ± 0%    | 0 ± 0%      | 5 ± 3%      |
| DCP                      | 86 ± 1%      | 53 ± 6%  | 39 ± 14%  | 14 ± 12% | 29 ± 4%     | 17 ± 4%        | 12 ± 6% | 5 ± 2%  | 14 ± 1%              | 8 ± 2%        | 8 ± 2% | 0 ± 0% | 1 ± 1%    | 0 ± 0%      | 5 ± 0%      |
| at planting              |              |          |           |          |             |                |         |         |                      |               |        |        |           |             |             |
| control                  | 86 ± 1%      | 43 ± 2%  | 38 ± 4%   | 5 ± 1%   | 32 ± 4%     | 20 ± 2%        | 12 ± 4% | 11 ± 1% | 14 ± 1%              | 2 ± 2%        | 2 ± 1% | 1 ± 0% | 1 ± 0%    | 0 ± 0%      | 10 ± 2%     |
| fluensulfone             | 86 ± 3%      | 44 ± 9%  | 33 ± 7%   | 11 ± 5%  | 26 ± 6%     | 13 ± 6%        | 13 ± 8% | 16 ± 3% | 14 ± 3%              | 5 ± 2%        | 5 ± 1% | 1 ± 0% | 3 ± 3%    | 0 ± 0%      | 5 ± 2%      |
| fosthiazate              | 88 ± 1%      | 48 ± 8%  | 42 ± 9%   | 5 ± 1%   | 27 ± 8%     | 19 ± 5%        | 8 ± 4%  | 13 ± 3% | 12 ± 1%              | 4 ± 0%        | 4 ± 1% | 0 ± 0% | 1 ± 0%    | 0 ± 0%      | 7 ± 0%      |
| DCP                      | 100 ± 0%     | 100 ± 0% | 100 ± 0%  | 0 ± 0%   | 0 ± 0%      | 0 ± 0%         | 0 ± 0%  | 0 ± 0%  | 0 ± 0%               | 0 ± 0%        | 0 ± 0% | 0 ± 0% | 0 ± 0%    | 0 ± 0%      | 0 ± 0%      |
| 1-month after planting   |              |          |           |          |             |                |         |         |                      |               |        |        |           |             |             |
| control                  | 83 ± 2%      | 57 ± 3%  | 46 ± 4%   | 12 ± 2%  | 23 ± 4%     | 14 ± 2%        | 9 ± 6%  | 3 ± 1%  | 17 ± 2%              | 7 ± 6%        | 6 ± 5% | 1 ± 0% | 2 ± 1%    | 0 ± 0%      | 9 ± 3%      |
| fluensulfone             | 84 ± 6%      | 47 ± 1%  | 39 ± 2%   | 8 ± 1%   | 30 ± 3%     | 17 ± 5%        | 12 ± 1% | 8 ± 1%  | 16 ± 6%              | 6 ± 5%        | 6 ± 4% | 0 ± 0% | 0 ± 0%    | 0 ± 0%      | 9 ± 2%      |
| fosthiazate              | 81 ± 4%      | 42 ± 4%  | 36 ± 6%   | 6 ± 3%   | 28 ± 6%     | 19 ± 6%        | 10 ± 3% | 10 ± 3% | 19 ± 4%              | 8 ± 6%        | 8 ± 6% | 0 ± 0% | 2 ± 3%    | 0 ± 0%      | 9 ± 2%      |
| DCP                      | 99 ± 2%      | 97 ± 3%  | 95 ± 2%   | 2 ± 1%   | 0 ± 0%      | 0 ± 0%         | 0 ± 0%  | 1 ± 1%  | 1 ± 2%               | 1 ± 1%        | 1 ± 1% | 0 ± 0% | 0 ± 0%    | 0 ± 0%      | 0 ± 0%      |
| 2-month after planting   |              |          |           |          |             |                |         |         |                      |               |        |        |           |             |             |
| control                  | 80 ± 4%      | 50 ± 3%  | 30 ± 6%   | 20 ± 4%  | 20 ± 5%     | 9 ± 1%         | 12 ± 6% | 9 ± 2%  | 20 ± 4%              | 6 ± 2%        | 6 ± 2% | 0 ± 0% | 4 ± 4%    | 0 ± 0%      | 10 ± 4%     |
| fluensulfone             | 85 ± 6%      | 49 ± 2%  | 43 ± 3%   | 6 ± 1%   | 27 ± 5%     | 20 ± 6%        | 7 ± 4%  | 9 ± 2%  | 15 ± 6%              | 3 ± 1%        | 2 ± 2% | 0 ± 0% | 5 ± 5%    | 0 ± 0%      | 8 ± 3%      |
| fosthiazate              | 95 ± 4%      | 57 ± 10% | 51 ± 7%   | 6 ± 3%   | 26 ± 4%     | 16 ± 1%        | 10 ± 3% | 12 ± 4% | 5 ± 4%               | 2 ± 2%        | 2 ± 2% | 0 ± 0% | 1 ± 1%    | 0 ± 0%      | 3 ± 3%      |
| DCP                      | 100 ± 0%     | 94 ± 1%  | 90 ± 4%   | 4 ± 3%   | 2 ± 0%      | 0 ± 0%         | 1 ± 0%  | 5 ± 1%  | 0 ± 0%               | 0 ± 0%        | 0 ± 0% | 0 ± 0% | 0 ± 0%    | 0 ± 0%      | 0 ± 0%      |

Ushiku II

|                        | bacterivore  |          |           |         |             |                |        |         | fungivore & omnivore |               |        |         |           |             |             |
|------------------------|--------------|----------|-----------|---------|-------------|----------------|--------|---------|----------------------|---------------|--------|---------|-----------|-------------|-------------|
|                        | Cephalobidae |          |           |         | Rhabditidae |                |        |         | other bacterivore    | Aphelenchidae |        |         | Filenchus | Ditylenchus | Dorylaimida |
|                        | Acroboloidea | others   | Rhabditis | others  | Aphelenchus | Aphelenchoides |        |         |                      |               |        |         |           |             |             |
| at planting            |              |          |           |         |             |                |        |         |                      |               |        |         |           |             |             |
| control                | 68 ± 11%     | 57 ± 13% | 36 ± 15%  | 21 ± 3% | 8 ± 1%      | 4 ± 1%         | 4 ± 0% | 3 ± 2%  | 32 ± 11%             | 23 ± 9%       | 9 ± 4% | 14 ± 5% | 5 ± 1%    | 0 ± 0%      | 4 ± 2%      |
| fluensulfone           | 81 ± 4%      | 62 ± 14% | 42 ± 11%  | 21 ± 3% | 16 ± 10%    | 8 ± 4%         | 8 ± 5% | 3 ± 1%  | 19 ± 4%              | 11 ± 2%       | 4 ± 1% | 7 ± 3%  | 2 ± 2%    | 1 ± 0%      | 5 ± 4%      |
| fosthiazate            | 81 ± 3%      | 68 ± 3%  | 51 ± 5%   | 16 ± 2% | 11 ± 2%     | 6 ± 1%         | 5 ± 0% | 2 ± 1%  | 19 ± 3%              | 7 ± 0%        | 4 ± 1% | 3 ± 1%  | 8 ± 6%    | 0 ± 0%      | 4 ± 3%      |
| 1-month after planting |              |          |           |         |             |                |        |         |                      |               |        |         |           |             |             |
| control                | 61 ± 12%     | 45 ± 16% | 23 ± 11%  | 22 ± 5% | 8 ± 2%      | 4 ± 1%         | 5 ± 0% | 8 ± 3%  | 39 ± 12%             | 23 ± 8%       | 7 ± 3% | 16 ± 6% | 11 ± 6%   | 0 ± 0%      | 6 ± 1%      |
| fluensulfone           | 63 ± 14%     | 45 ± 7%  | 23 ± 6%   | 22 ± 3% | 13 ± 7%     | 7 ± 3%         | 6 ± 4% | 6 ± 2%  | 37 ± 14%             | 19 ± 7%       | 5 ± 3% | 14 ± 4% | 13 ± 9%   | 0 ± 0%      | 5 ± 1%      |
| fosthiazate            | 87 ± 1%      | 77 ± 5%  | 64 ± 3%   | 14 ± 3% | 8 ± 3%      | 5 ± 2%         | 3 ± 2% | 2 ± 1%  | 13 ± 1%              | 4 ± 0%        | 2 ± 0% | 2 ± 1%  | 3 ± 2%    | 0 ± 0%      | 6 ± 2%      |
| 2-month after planting |              |          |           |         |             |                |        |         |                      |               |        |         |           |             |             |
| control                | 78 ± 8%      | 52 ± 13% | 27 ± 7%   | 25 ± 6% | 16 ± 2%     | 10 ± 2%        | 6 ± 1% | 10 ± 3% | 22 ± 8%              | 6 ± 2%        | 3 ± 1% | 3 ± 1%  | 5 ± 1%    | 0 ± 0%      | 12 ± 8%     |
| fluensulfone           | 70 ± 4%      | 45 ± 3%  | 21 ± 3%   | 25 ± 1% | 17 ± 6%     | 10 ± 4%        | 7 ± 2% | 8 ± 1%  | 30 ± 4%              | 10 ± 6%       | 4 ± 3% | 6 ± 2%  | 7 ± 4%    | 0 ± 0%      | 12 ± 5%     |
| fosthiazate            | 83 ± 4%      | 52 ± 2%  | 35 ± 3%   | 16 ± 2% | 23 ± 0%     | 16 ± 3%        | 7 ± 3% | 7 ± 1%  | 17 ± 4%              | 4 ± 0%        | 4 ± 0% | 0 ± 0%  | 2 ± 1%    | 0 ± 0%      | 10 ± 4%     |

Table S1. (Continued.)

## Miyazaki

|                        | bacterivore |               |          |          |             |          |             |                   | fungivore & omnivore |                |         |         |           |             |         |
|------------------------|-------------|---------------|----------|----------|-------------|----------|-------------|-------------------|----------------------|----------------|---------|---------|-----------|-------------|---------|
|                        |             | Cephalobidae  |          |          | Rhabditidae |          |             | other bacterivore |                      | Aphelenchidae  |         |         | Filenchus | Dorylaimida | Others  |
|                        |             | Acrobolooides | others   |          | Rhabditis   | others   | Aphelenchus |                   |                      | Aphelenchoides |         |         |           |             |         |
| at planting            |             |               |          |          |             |          |             |                   |                      |                |         |         |           |             |         |
| control                | 88% ± 2%    | 14% ± 4%      | 8% ± 2%  | 6% ± 2%  | 68% ± 9%    | 40% ± 4% | 28% ± 5%    | 6% ± 5%           | 12% ± 2%             | 3% ± 1%        | 2% ± 0% | 2% ± 1% | 2% ± 1%   | 6% ± 0%     | 0% ± 0% |
| fluensulfone           | 87% ± 3%    | 18% ± 6%      | 11% ± 2% | 7% ± 4%  | 63% ± 4%    | 37% ± 5% | 26% ± 2%    | 6% ± 5%           | 13% ± 3%             | 3% ± 1%        | 2% ± 0% | 1% ± 1% | 3% ± 1%   | 6% ± 3%     | 1% ± 0% |
| fosthizate             | 89% ± 1%    | 18% ± 3%      | 11% ± 4% | 6% ± 1%  | 67% ± 3%    | 36% ± 3% | 30% ± 6%    | 5% ± 3%           | 11% ± 1%             | 3% ± 1%        | 1% ± 1% | 1% ± 1% | 3% ± 2%   | 5% ± 1%     | 1% ± 0% |
| 1-month after planting |             |               |          |          |             |          |             |                   |                      |                |         |         |           |             |         |
| control                | 80% ± 7%    | 22% ± 2%      | 4% ± 3%  | 18% ± 2% | 53% ± 6%    | 32% ± 5% | 21% ± 5%    | 5% ± 2%           | 20% ± 7%             | 2% ± 1%        | 1% ± 0% | 1% ± 1% | 2% ± 0%   | 16% ± 6%    | 0% ± 0% |
| fluensulfone           | 80% ± 7%    | 22% ± 2%      | 6% ± 1%  | 16% ± 3% | 52% ± 10%   | 31% ± 2% | 20% ± 9%    | 6% ± 2%           | 20% ± 7%             | 1% ± 0%        | 1% ± 1% | 0% ± 0% | 6% ± 2%   | 12% ± 5%    | 1% ± 1% |
| fosthizate             | 96% ± 1%    | 36% ± 11%     | 17% ± 6% | 19% ± 7% | 52% ± 8%    | 31% ± 3% | 21% ± 7%    | 8% ± 3%           | 4% ± 1%              | 1% ± 1%        | 1% ± 1% | 1% ± 1% | 1% ± 1%   | 2% ± 1%     | 0% ± 0% |
| 2-month after planting |             |               |          |          |             |          |             |                   |                      |                |         |         |           |             |         |
| control                | 67% ± 13%   | 20% ± 3%      | 7% ± 2%  | 13% ± 2% | 35% ± 17%   | 9% ± 4%  | 26% ± 14%   | 13% ± 1%          | 33% ± 13%            | 0% ± 0%        | 0% ± 0% | 0% ± 0% | 11% ± 7%  | 21% ± 8%    | 1% ± 1% |
| fluensulfone           | 81% ± 2%    | 30% ± 3%      | 12% ± 1% | 18% ± 3% | 42% ± 4%    | 7% ± 3%  | 35% ± 2%    | 9% ± 1%           | 19% ± 2%             | 2% ± 1%        | 1% ± 0% | 1% ± 1% | 10% ± 5%  | 6% ± 3%     | 0% ± 0% |
| fosthizate             | 89% ± 8%    | 50% ± 11%     | 24% ± 5% | 25% ± 7% | 32% ± 6%    | 6% ± 4%  | 26% ± 3%    | 7% ± 1%           | 11% ± 8%             | 1% ± 0%        | 1% ± 0% | 0% ± 0% | 4% ± 2%   | 5% ± 7%     | 0% ± 0% |

## Chiba

|                        | bacterivore |               |          |          |             |          |             |                   | fungivore & omnivore |                |         |         |           |             |         |
|------------------------|-------------|---------------|----------|----------|-------------|----------|-------------|-------------------|----------------------|----------------|---------|---------|-----------|-------------|---------|
|                        |             | Cephalobidae  |          |          | Rhabditidae |          |             | other bacterivore |                      | Aphelenchidae  |         |         | Filenchus | Dorylaimida | Others  |
|                        |             | Acrobolooides | others   |          | Rhabditis   | others   | Aphelenchus |                   |                      | Aphelenchoides |         |         |           |             |         |
| at planting            |             |               |          |          |             |          |             |                   |                      |                |         |         |           |             |         |
| control                | 84% ± 2%    | 53% ± 4%      | 41% ± 4% | 13% ± 1% | 18% ± 4%    | 11% ± 3% | 8% ± 3%     | 12% ± 2%          | 16% ± 2%             | 6% ± 2%        | 3% ± 1% | 3% ± 1% | 5% ± 2%   | 5% ± 1%     | 0% ± 0% |
| fluensulfone           | 79% ± 5%    | 52% ± 3%      | 42% ± 4% | 10% ± 2% | 18% ± 4%    | 12% ± 3% | 7% ± 2%     | 9% ± 2%           | 21% ± 5%             | 14% ± 3%       | 7% ± 3% | 7% ± 1% | 3% ± 1%   | 5% ± 2%     | 0% ± 0% |
| fosthizate             | 85% ± 5%    | 51% ± 5%      | 36% ± 6% | 15% ± 2% | 20% ± 7%    | 13% ± 4% | 7% ± 3%     | 14% ± 3%          | 15% ± 5%             | 7% ± 2%        | 4% ± 1% | 3% ± 1% | 4% ± 3%   | 4% ± 2%     | 0% ± 0% |
| 1-month after planting |             |               |          |          |             |          |             |                   |                      |                |         |         |           |             |         |
| control                | 89% ± 2%    | 74% ± 4%      | 48% ± 3% | 26% ± 4% | 7% ± 1%     | 4% ± 2%  | 3% ± 0%     | 8% ± 4%           | 11% ± 2%             | 4% ± 1%        | 1% ± 0% | 3% ± 1% | 3% ± 2%   | 4% ± 0%     | 0% ± 0% |
| fluensulfone           | 90% ± 3%    | 70% ± 6%      | 49% ± 6% | 21% ± 5% | 15% ± 6%    | 9% ± 3%  | 6% ± 3%     | 6% ± 1%           | 10% ± 3%             | 4% ± 2%        | 1% ± 0% | 3% ± 1% | 3% ± 1%   | 3% ± 1%     | 0% ± 0% |
| fosthizate             | 94% ± 0%    | 81% ± 4%      | 66% ± 5% | 15% ± 4% | 7% ± 4%     | 5% ± 3%  | 3% ± 0%     | 5% ± 2%           | 6% ± 0%              | 4% ± 0%        | 0% ± 0% | 4% ± 0% | 1% ± 1%   | 2% ± 1%     | 0% ± 0% |
| 2-month after planting |             |               |          |          |             |          |             |                   |                      |                |         |         |           |             |         |
| control                | 88% ± 3%    | 73% ± 6%      | 36% ± 4% | 37% ± 9% | 11% ± 4%    | 5% ± 5%  | 6% ± 4%     | 4% ± 0%           | 12% ± 3%             | 4% ± 1%        | 1% ± 1% | 2% ± 1% | 5% ± 2%   | 4% ± 1%     | 0% ± 0% |
| fluensulfone           | 88% ± 1%    | 70% ± 3%      | 43% ± 1% | 27% ± 4% | 14% ± 4%    | 6% ± 3%  | 8% ± 2%     | 4% ± 2%           | 12% ± 1%             | 5% ± 1%        | 2% ± 0% | 3% ± 1% | 6% ± 2%   | 1% ± 0%     | 0% ± 0% |
| fosthizate             | 90% ± 5%    | 78% ± 6%      | 61% ± 7% | 17% ± 2% | 7% ± 2%     | 2% ± 0%  | 5% ± 2%     | 5% ± 3%           | 10% ± 5%             | 0% ± 0%        | 0% ± 0% | 0% ± 0% | 6% ± 2%   | 2% ± 3%     | 0% ± 0% |

Mean ± standard deviation.
